# Supplementary material for: Translation and cross-cultural adaptation of the Nepali version of Sexual Interest and Satisfaction Scale (SIS): a cross-sectional study
Source: PubMed Central journal article supplement (PMC11607224; doi:10.1186/s41687-024-00816-7), 2024-11-29
Supplement: 41687_2024_816_MOESM1_ESM.pdf [file 41687_2024_816_MOESM1_ESM.pdf]

## यौन रुचि र सन्तुष्टि मापन

कृपया तलका विकल्पहरू मध्ये एउटा छनौट गर्नुहोस् र यसको छेउमा सहि (✓) चिन्ह राख्नुहोस्।

(यहाँ यौनिकताले यौन, लैङ्गिक पहिचान, यौनिक अभिमुखीकरण, आनन्द, घनिष्ठता र प्रजननलाई जनाउँछ। यौन शारीरिक मात्र नभई मानसिक वा भावनात्मक अथवा कुनै उपकरण, हस्तमैथुन, कामुक चलचित्र आदिबाट पनि प्राप्त हुन सक्छ।)

| क्षेत्रहरू                       | प्रश्नहरू                                                                                                                                                                                                                |
|----------------------------------|--------------------------------------------------------------------------------------------------------------------------------------------------------------------------------------------------------------------------|
| १. यौन चाहना                     | तपाईंको यौन चाहना चोट पहिलेको तुलनामा अहिले कस्तो छ?<br><ul style="list-style-type: none"> <li>• कुनै चाहना छैन (०)</li> <li>• घटेको छ (१)</li> <li>• कुनै परिवर्तन छैन (२)</li> <li>• बढेको छ (३)</li> </ul>            |
| २. यौनिकताको महत्त्व             | तपाईंलाई यौनिकताको महत्त्व चोट पहिलेको तुलनामा अहिले कस्तो छ?<br><ul style="list-style-type: none"> <li>• कुनै चाहना छैन (०)</li> <li>• घटेको छ (१)</li> <li>• कुनै परिवर्तन छैन (२)</li> <li>• बढेको छ (३)</li> </ul>   |
| ३. व्यक्तिगत सन्तुष्टिको अनुभूति | तपाईंको यौनिकतामा आफु रमाउने क्षमता र सम्भावनाहरू कस्ता छन्?<br><ul style="list-style-type: none"> <li>• धेरै असन्तोषजनक (०)</li> <li>• असन्तोषजनक (१)</li> <li>• सन्तोषजनक (२)</li> <li>• धेरै सन्तोषजनक (३)</li> </ul> |

के तपाईंको यौन साथी हुनुहुन्छ?  छ  छैन

यदि हुनुहुन्छ भने, कृपया निम्न प्रश्नहरूको पनि उत्तर दिनुहोला ।

|                                                                   |                                                                                                                                                                                                                                                        |
|-------------------------------------------------------------------|--------------------------------------------------------------------------------------------------------------------------------------------------------------------------------------------------------------------------------------------------------|
| ४. चोटपश्चात यौन जीवनसँगको साधारण सन्तुष्टि *                     | तपाईंको चोटपछि अधिकांश समयमा यौन साथीसँगको सम्बन्ध कस्तो छ?<br>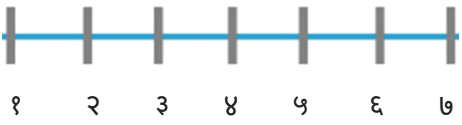                                                                                                    |
| ५. तुलनात्मक रूपमा चोट लाग्नु अघि र पछिको साधारण यौन सन्तुष्टि ** | तपाईंको चोटअघि अधिकांश समयमा यौन साथीसँगको सम्बन्ध कस्तो थियो?<br>                                                                                                 |
| ६. यौन साथीलाई सन्तुष्टि दिने क्षमताको स्व. मूल्याङ्कन            | तपाईंको यौन साथीलाई यौन चाहना परीपूर्ति गर्न सक्ने तपाईंको क्षमता र सम्भावनाहरू कस्ता छन्?<br><ul style="list-style-type: none"> <li>• धेरै असन्तोषजनक (०)</li> <li>• असन्तोषजनक (१)</li> <li>• सन्तोषजनक (२)</li> <li>• धेरै सन्तोषजनक (३)</li> </ul> |

कुल (०-१८) = \_\_\_\_\_

४ क्र.स. र ५ क्र.स. कोलागि रिपोर्ट गरिएको प्राप्त्यांक ०-३ दायरा बीचको हुँदैन। रिपोर्ट गरिएको प्राप्त्यांक लिनुहोस् र समग्र प्राप्त्यांक (०-१८) को लागी उचित मापन प्राप्त्यांक (०-३) पत्ता लगाउन तलका तालिकाहरूसँग तुलना गर्नुहोस्।

\* समग्र प्राप्त्यांकको लागी मिलाउदा (४ क्र.स.):

| VRS प्राप्त्यांकको दायरा: | समग्र प्राप्त्यांक (०-३): |
|---------------------------|---------------------------|
| १                         | ०                         |
| २ - ३                     | १                         |
| ४ - ५                     | २                         |
| ६ - ७                     | ३                         |

\*\* समग्र प्राप्त्यांकको लागी मिलाउदा (५ क्र.स.):

| VRS भिन्नताको प्राप्त्यांकको दायरा:: | समग्र प्राप्त्यांक (०-३): |
|--------------------------------------|---------------------------|
| <-२                                  | ०                         |
| -२ वा -१                             | १                         |
| ०                                    | २                         |
| >०                                   | ३                         |

० - १८ को अन्तिम अंक प्राप्त गर्न प्रत्येक कोटिबाट प्राप्त्यांकहरू सँगै जोड्नुहोस्।
